# Supplementary material for: 3D-printed organic electrochemical transistors on microfluidic paper for multianalyte point-of-care testing
Source: Royal Society of Chemistry journal article supplement (doi:10.1039/d5tc01231g), 2025-01-01
Supplement: d5tc01231g1.pdf [file d5tc01231g1.pdf]

## Supplementary information

### 3D-printed organic electrochemical transistors on microfluidic paper for multianalyte point-of-care testing

Yanchen Qiu<sup>†a</sup>, Qi Zhang<sup>†a</sup>, Ruizhe Wang<sup>a</sup>, Weichu Chen<sup>a</sup>, Xiang Li<sup>a</sup>, Yuwen Zhu<sup>\*a</sup>,  
Meifang Zhu<sup>a</sup>, Gang Wang<sup>\*ab</sup> and Hengda Sun<sup>\*ac</sup>

*a. State Key Laboratory of Advanced Fiber Materials, College of Materials Science and Engineering, Donghua University, Shanghai, China 201620. Email: ywzhu@dhu.edu.cn, gwf8707@dhu.edu.cn, sunhengda@dhu.edu.cn*

*b. Yuyue Home Textile Co., Ltd., Shandong, Binzhou, China 256623.*

*c. Pingdingshan Industrial Technology Research Institute, Henan Academy of Sciences, Henan, Zhengzhou, China 450046.*

<sup>†</sup> These authors contributed equally to this work.

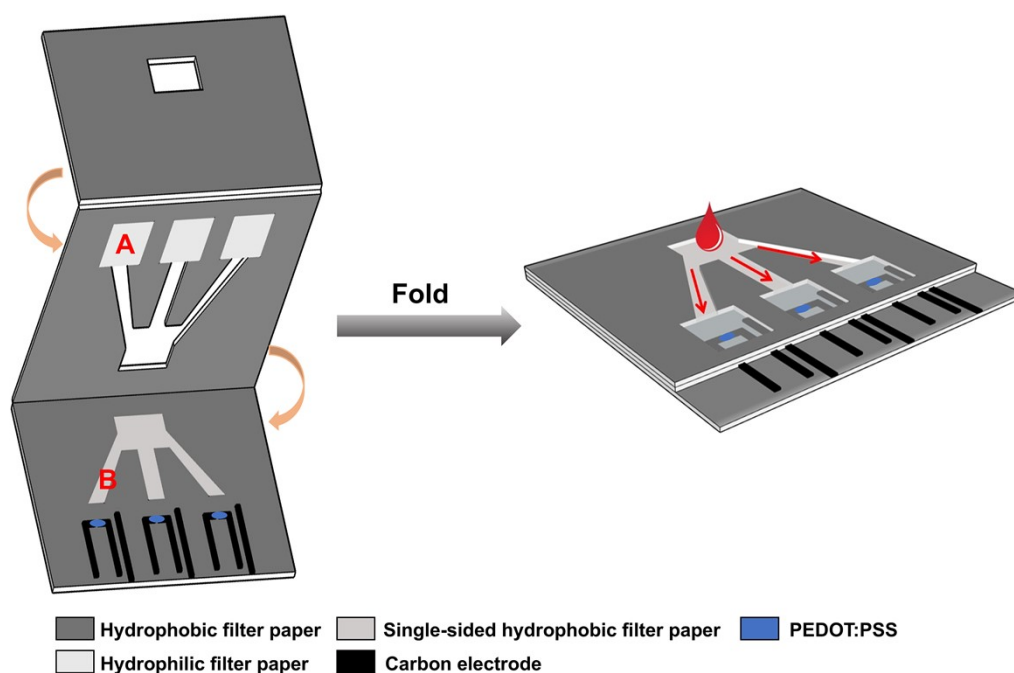

**Fig. S1** Device folding schematic diagram: section A: hydrophilic filter paper, section B: single-sided hydrophilic channels.

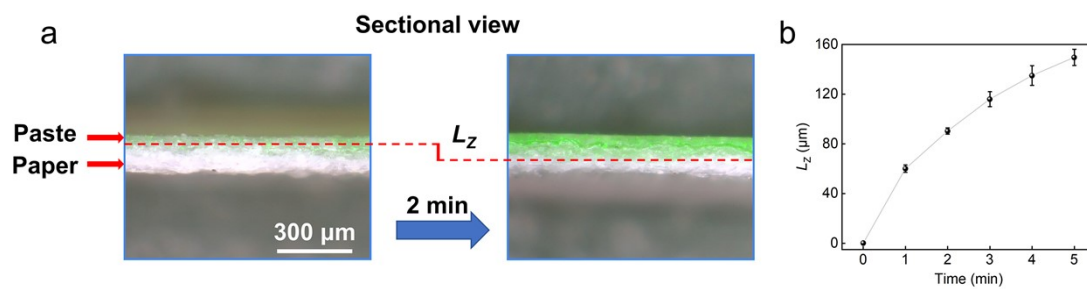

**Fig. S2** Vertical penetration of the paste: (a) definition of  $L_z$ , (b) relationship between  $L_z$  and time.

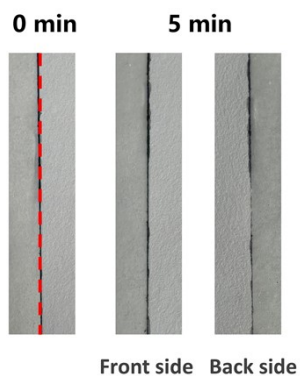

**Fig. S3** Lateral penetration of the paste.

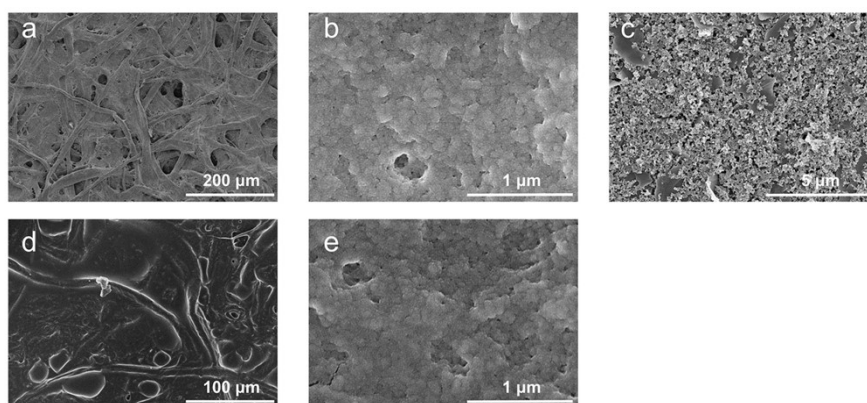

**Fig. S4** Microscopic morphology characterization: (a) filter paper, (b) biofunctionalized gate (GOx), (c) carbon electrode, (d) hydrophobic filter paper, (e) biofunctionalized gate (ChOx).

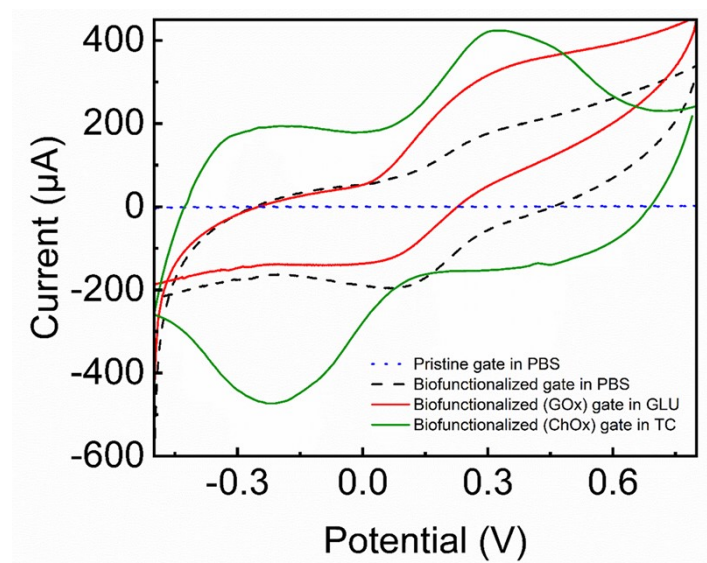

**Fig. S5** Electrochemical system validation of ferrocene and enzyme immobilization.

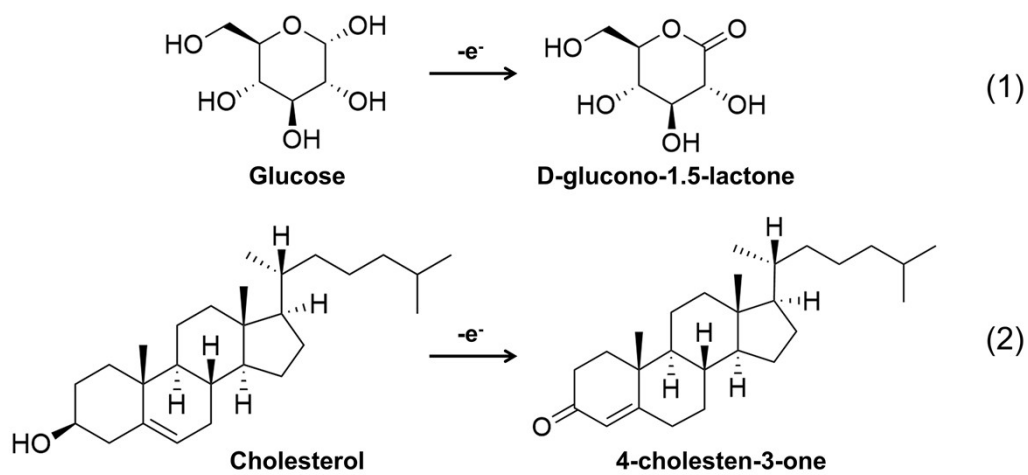

**Fig. S6** Enzyme catalysis process of glucose (1) and cholesterol (2).

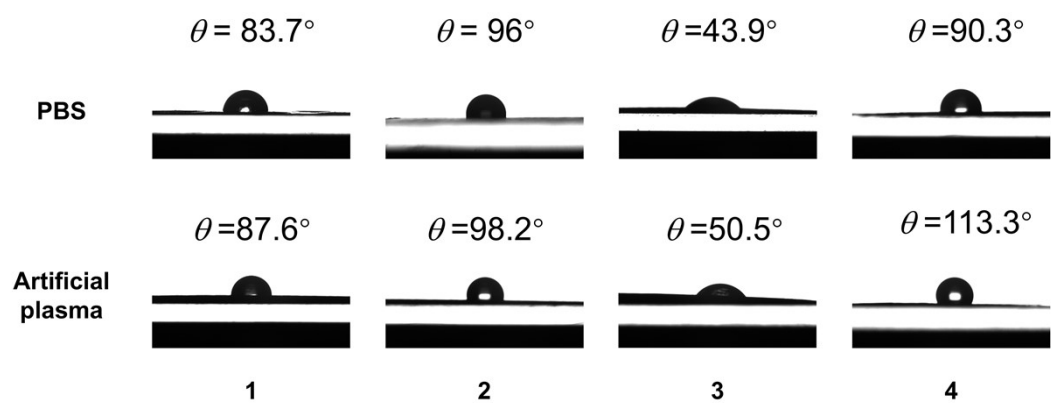

**Fig. S7** The specific image of the contact angle.

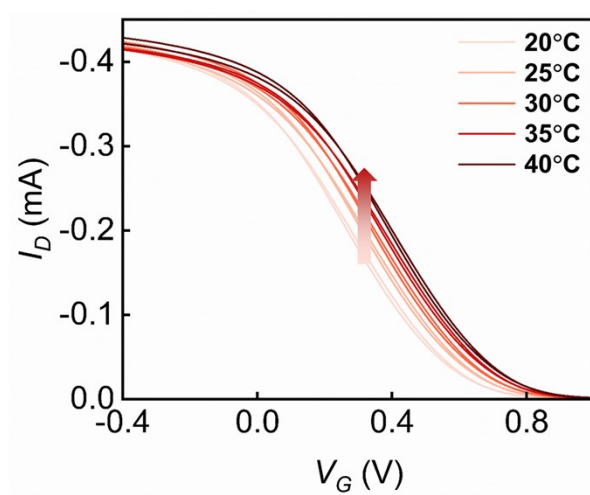

**Fig. S8** Effect of temperature on device performance.

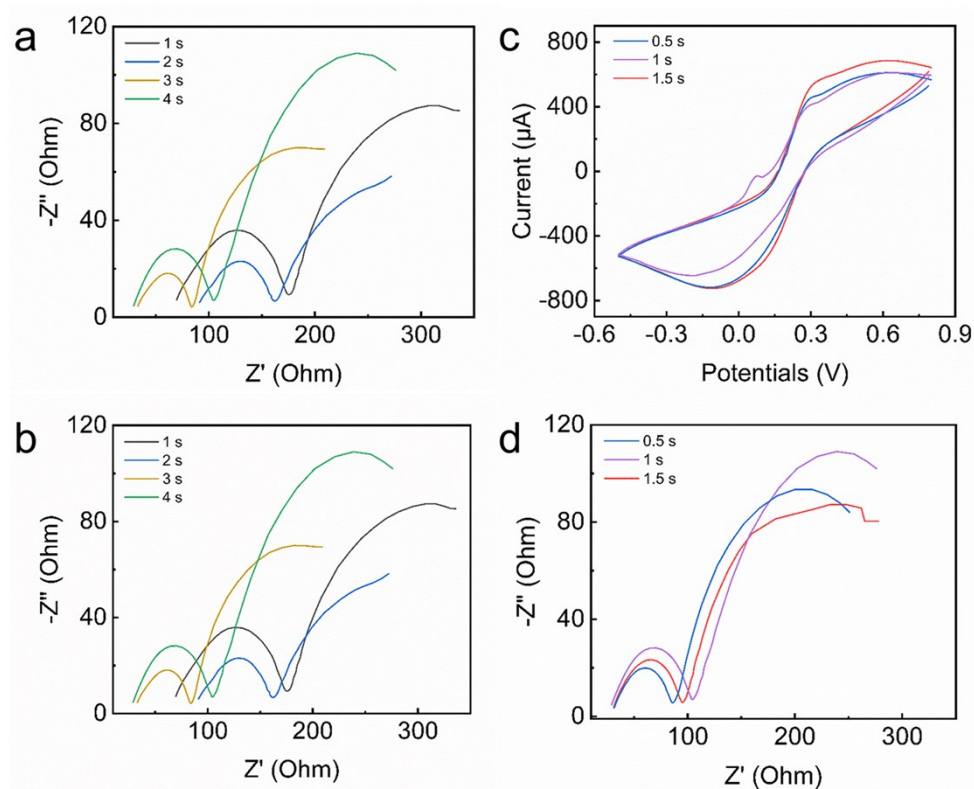

**Fig. S9** Optimization of the fabrication of OECT-based sensors (a, b) modify the carbon electrode with PEODT:PSS, controlling the extrusion time to 1, 2, 3 and 4 seconds. The modified electrodes are used as working electrodes for CV and EIS measurements. (c, d) control the extrusion time of the ferrocene solution to 0.5, 1 and 1.5 seconds.

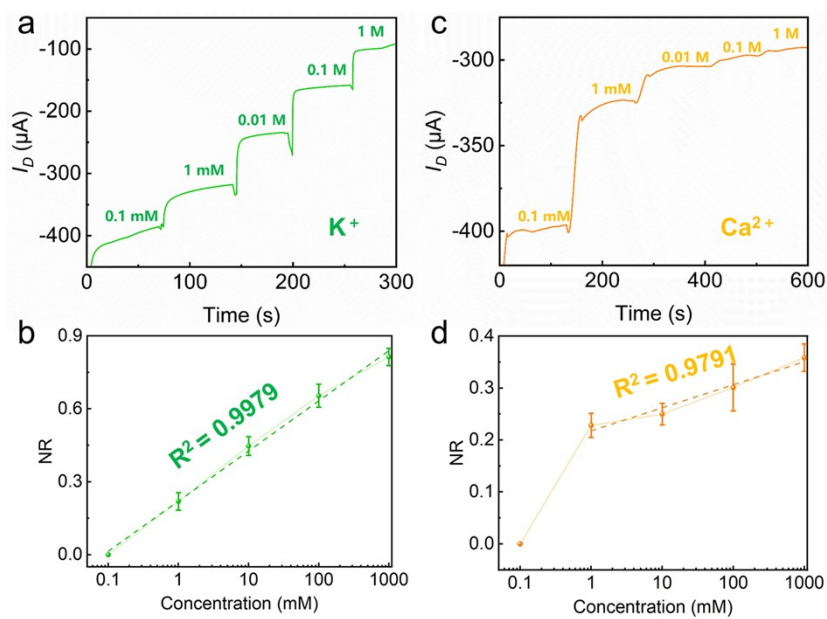

**Fig. S10** Ion-sensitive properties of potassium and calcium ions (a, b) potassium ions, (c, d) calcium ions.

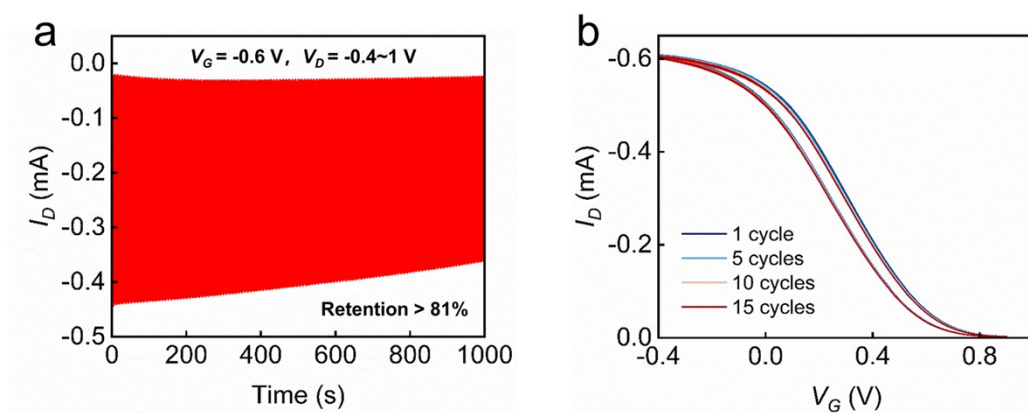

**Fig. S11** Stability of PET-based OEETs.

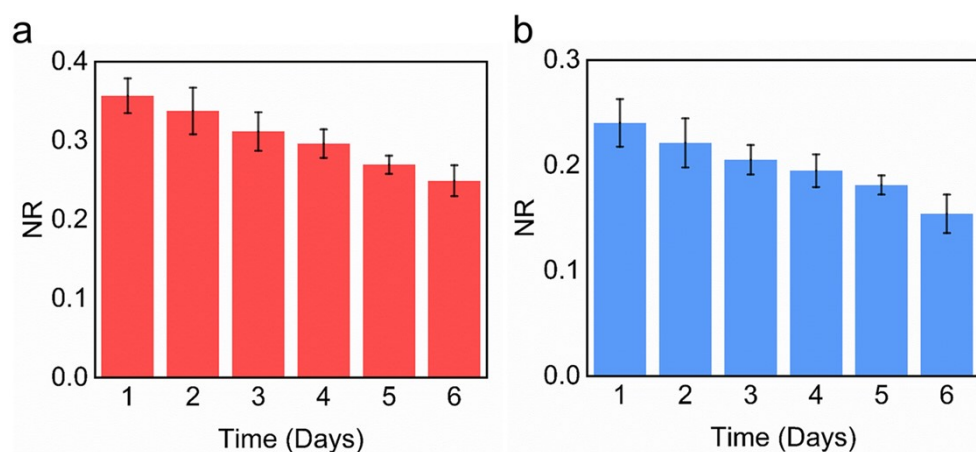

**Fig. S12** Long-term storage stability of biofunctionalized devices: (a) biofunctionalized gate (GOx), (b) biofunctionalized gate (ChOx).

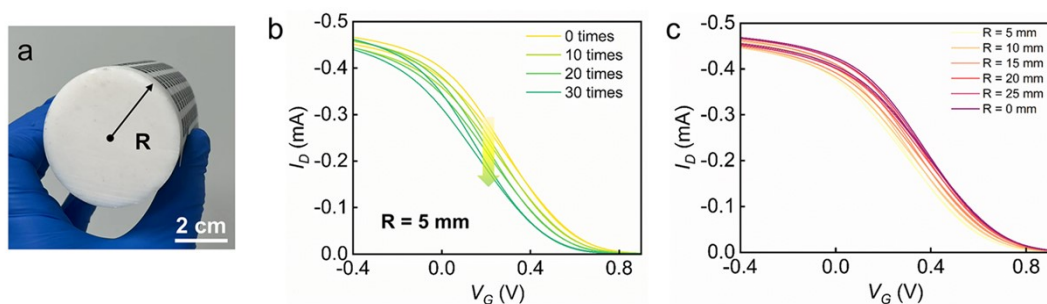

**Fig. S13** Mechanical bending performance of paper-based OEETs.

**Table S1** Thickness of each part of the device

| Material                              | Thickness (mm)    |
|---------------------------------------|-------------------|
| Filter paper                          | $0.147 \pm 0.005$ |
| Hydrophobic filter paper              | $0.154 \pm 0.008$ |
| Filter paper with carbon electrode    | $0.163 \pm 0.024$ |
| Single-sided hydrophilic filter paper | $0.242 \pm 0.037$ |

**Table S2** Comparison of the sensitivity of OECTs on different substrates

| Material     | Biomarkers    | Linear range equation       | LOD               |
|--------------|---------------|-----------------------------|-------------------|
| Filter paper | $\text{Na}^+$ | $0.20 + 0.21 \Delta I/I_0$  | 1 $\mu\text{M}$   |
|              | Glucose       | $-2.12 + 0.95 \Delta I/I_0$ | 50 $\mu\text{M}$  |
|              | Cholesterol   | $-1.40 + 0.63 \Delta I/I_0$ | 100 $\mu\text{M}$ |
| PET          | $\text{Na}^+$ | $0.16 + 0.17 \Delta I/I_0$  | 1 $\mu\text{M}$   |
|              | Glucose       | $-1.52 + 0.79 \Delta I/I_0$ | 50 $\mu\text{M}$  |
|              | Cholesterol   | $-2.36 + 0.63 \Delta I/I_0$ | 50 $\mu\text{M}$  |

**Video S1** Time to absorb water <1 s (See annex for details)

**Video S2** Time to absorb artificial plasma <1 s (See annex for details)
